# Supplementary material
Source: MDPI journal article supplement (https://www.mdpi.com/2624-845X/4/4/21)
Supplement: s1 [file s1]

Article

# Efficacy of 15 nm Gold Nanoparticles for Image-Guided Gliosarcoma Radiotherapy

Elette Engels <sup>1,2</sup>, Michael Lerch <sup>1</sup>, Stéphanie Corde <sup>1,3</sup> and Moeava Tehei <sup>1,\*</sup>

<sup>1</sup> Centre for Medical Radiation Physics, University of Wollongong, Wollongong, NSW 2522, Australia; elette@uow.edu.au (E.E.); mlerch@uow.edu.au (M.L.); scorde@uow.edu.au (S.C.)

<sup>2</sup> Australian Nuclear Science and Technology Organisation (ANSTO), Australian Synchrotron, Clayton, VIC 3168, Australia

<sup>3</sup> Prince of Wales Hospital, Randwick, NSW 2031, Australia

\* Correspondence: moeava@uow.edu.au

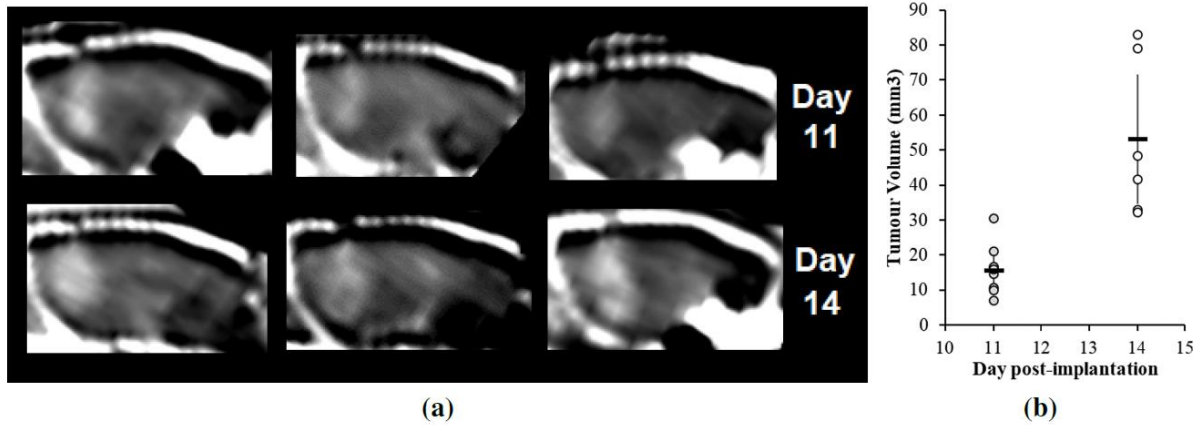

**Figure S1.** 9LGS tumor volume increase from day 11 to 14 using iodine contrast. CT images shown for three rats (a) and the average tumor volumes for all 5 rats in the study shown (b).
