# Supplementary material
Source: MDPI journal article supplement (https://www.mdpi.com/2624-845X/4/4/21)
Supplement: s1 [file s1]

Archive with 1 entries (1 files):
- jnt-2668770-supplementary.pdf
